# 1     **Adaptation to warming increases the strength of an algal-grazer** 2                                   **interaction in naturally heated streams**

## 3     **Authors**

4     C. -Elisa Schaum<sup>1\*</sup>, Richard Ffrench-Constant<sup>2</sup>, Chris Lowe<sup>1,2</sup>, Jón S. Ólafsson<sup>3</sup>, Daniel  
5     Padfield<sup>1</sup> & Gabriel Yvon-Durocher<sup>1\*</sup>

## 7     **Author affiliations**

8     1 Environment and Sustainability Institute, University of Exeter, Penryn, Cornwall TR10 9EZ, UK

9     2 Centre for Ecology and Conservation, College of Life and Environmental Sciences, University of Exeter,  
10     Penryn, Cornwall, TR10 9FE, U.K.

11     3. Marine and Freshwater Research Institute, Árleyni 22, 112 Reykjavik, Iceland.

12     \* Corresponding authors: [g.yvon-durocher@exeter.ac.uk](mailto:g.yvon-durocher@exeter.ac.uk), [c.l.schaum@exeter.ac.uk](mailto:c.l.schaum@exeter.ac.uk)

## 14     **Author Contributions:**

15     GYD conceived the experiment. GYD and ES supervised the experiment, analysed data, and  
16     all authors wrote the manuscript.

17  
18     **Data accessibility statement:** All data will be made available as supporting information  
19     should the manuscript be accepted. R-Code for analysis will be available from the authors on  
20     request.

21  
22     **Keywords:** Consumer-resource interactions, global warming, metabolism, thermal  
23     adaptation, interaction strength

## 25     **Number of Figures: 3**

26     List: Figure 1: Map and experimental set-up. 2. Thermal reaction norms of grazer metabolic  
27     rates. 3. Long and short-term effects of elevated temperature on interaction strength and  
28     metabolic rates.

## 29     **Number of Tables:2**

30     List: 1. Physical and chemical characteristics of geothermal streams. 2. Parameter estimates  
31     and output of gnls models.

32     **Number of cited references: 67**

33

34 **ABSTRACT**

35 Trophic interactions are important determinants of the structure and functioning of  
36 ecosystems. As the metabolism and consumption rates of ectotherms increase sharply with  
37 rising temperature, there are currently major concerns that global warming will increase the  
38 strength of trophic interactions, destabilizing food webs, and altering ecosystem structure and  
39 function. We used geothermally warmed streams that span a ~10 °C temperature gradient to  
40 investigate the interplay between the thermal response of respiration, local adaptation, and  
41 the interaction strength between the keystone gastropod grazer, the wandering snail *Radix*  
42 *balthica*, and a common algal resource. Populations from a warm stream (~28°C) had higher  
43 maximal metabolic rates and optimal temperatures across all measurement temperatures than  
44 those from a colder stream (~17°C), suggesting local adaptation of metabolic rates. A  
45 reciprocal transplant experiment demonstrated that the interaction strength between the  
46 grazer and its resource were highest for both populations when transplanted into the warm  
47 stream. In line with the thermal response curves for respiration, interaction strengths of the  
48 warm-adapted grazers were higher than their cold-adapted counterparts in both the warm and  
49 the cold stream. These findings suggest that warming can increase the strength of algal-grazer  
50 interactions both through the thermodynamic effects of higher temperatures on physiological  
51 rates and through correlated increases in *per capita* metabolism and consumption as  
52 organisms adapt to warmer temperatures.

53

54 **Keywords:** Consumer-resource interactions, global warming, metabolism, thermal  
55 adaptation, interaction strength

56

57

58 **INTRODUCTION**

59 The strength of consumer-resource interactions (e.g. the effect of a consumer on the  
60 population density of its prey) play a critical role in shaping the stability of food webs (May  
61 1973; Paine 1980; McCann *et al.* 1998; Otto *et al.* 2007). Grazing is an important class of  
62 consumer-resource interaction, determining the flux of energy and materials from autotrophs  
63 to heterotrophs. There are currently major concerns that global warming will increase the  
64 impact of grazers on algal or plant communities because the ingestion and respiration rates of  
65 heterotrophs tend to be more sensitive to rising temperatures than rates of photosynthesis and  
66 growth in autotrophs (O'Connor 2009; Gilbert *et al.* 2014; West and Post 2016). Stronger  
67 interactions have the potential to destabilise food webs and consequently, warming induced  
68 increases in interaction strengths could have fundamental implications for ecosystem  
69 structure and function. For example, elevated grazing rates in aquatic ecosystems, driven by  
70 the mismatch in thermal sensitivity between autotrophs and heterotrophs, are a key driver of  
71 projected declines in aquatic primary production over the 21<sup>st</sup> century in models of ocean  
72 biogeochemistry (Laufkötter *et al.* 2015).

73 The effects of temperature on metabolic rates and traits associated with consumer-  
74 resource interactions (e.g. consumption rates, handling times) often follow characteristic  
75 unimodal thermal response curves, in which rates increase exponentially to an optimum and  
76 decline rapidly thereafter (Dell *et al.* 2011, 2014; Englund *et al.* 2011; Rall *et al.* 2012;  
77 Gilbert *et al.* 2014). Integrating thermal responses for metabolism and interaction-traits with  
78 dynamical models of consumer-resource interactions offers a promising framework for  
79 predicting food web responses to global warming (Vasseur and McCann 2005; Shurin *et al.*  
80 2012; Binzer *et al.* 2016). However, thermal response curves are often evolutionarily flexible  
81 (Angilletta *et al.* 2003; Kingsolver *et al.* 2004; Deutsch *et al.* 2008; Kingsolver and Huey  
82 2008) and can shift as organisms adapt to novel thermal environments, meaning that rapid  
83 evolution could modulate the effects of rising temperatures on the strength of species

84 interactions. For example, if thermal adaptation serves to down-regulate metabolic rates at  
85 higher temperatures (Addo-Bediako *et al.* 2002), then rapid evolutionary responses to  
86 warming could mitigate predicted increases in consumer-resource interaction strength. How  
87 adaptation to warming affects rates of metabolism and in turn, the strength of consumer-  
88 resource interactions, is largely unknown, limiting our ability to predict how trophic  
89 interactions will change in response to warming in the long-term.

90         There is evidence from studies across naturally occurring thermal gradients over large  
91 spatial scales, that local thermal adaptation can play an important role in shaping the strength  
92 of species interactions (Barton 2011; De Block *et al.* 2012). While these studies provide  
93 important insights into how consumer-resource interactions are shaped by evolution across  
94 thermal gradients (Fukami and Wardle 2005), their usefulness for understanding the  
95 mechanisms underlying responses to rapid climate warming might be limited, because other  
96 factors, such as day length, light intensity and precipitation, tend to be confounded with  
97 temperature along such broad scale spatial gradients. Furthermore, the timescales over which  
98 local adaptation has occurred in such broad scale studies could be much longer than the rapid  
99 evolutionary change required to keep pace with climate warming (Loarie *et al.* 2009;  
100 Hoffmann and Sgrò 2011). Here, we focus on the *interplay* between the effects of local  
101 thermal adaptation on metabolism and the strength of a keystone grazing interaction (the  
102 gastropod *Radix balthica*, which grazes algal biofilms in streams) in naturally warmed  
103 Icelandic geothermal streams spanning a gradient of 11°C. Critically, temperature is the main  
104 abiotic factor that varies among streams in the catchment and is not correlated with pH,  
105 conductivity or inorganic nutrient concentrations (see Table 1), and the streams are thought to  
106 have been subject to geothermal heating for at least the last century (O'Gorman *et al.* 2012).  
107 This system therefore provides the opportunity to investigate the mechanisms that shape how  
108 temperature and local adaptation influence species interactions in a natural system, where the

109 effects of confounding factors are minimised. Specifically, we ask (i) can the underlying  
110 responses of metabolism to temperature explain the magnitude of the effects of warming on  
111 the strength of algal-grazer interactions? (ii) Can local thermal adaptation dampen the direct  
112 effects of warming on the strength of consumer-resource interactions?

## 113 **METHODS**

### 114 **Study site**

117 The streams are located North of the Icelandic Hveragerði valley, in the south east of the  
118 Hengil high temperature geothermal field (N64° 0' 2.944" W21° 11' 17.451") and consist of a  
119 catchment of 11 streams spanning a temperature gradient of approximately 20 °C (see Figure  
120 1 and SI Figure 1). Two streams, stream 5 (17.5 °C ± 4.5 °C, hereafter 'cold stream') and  
121 stream 11A (28.3 °C ± 1.3 °C, hereafter 'warm stream'), were chosen for experiments due to  
122 their close proximity, large temperature difference and the abundance of the keystone grazer,  
123 *Radix balthica*. The grazer plays an important functional role geothermal stream ecosystems,  
124 where grazer biomass as well as grazing rates are strongly influenced by temperature  
125 (O'Gorman *et al.* 2012). The two streams are similar in all other measured physical and  
126 chemical characteristics but differ in average temperature by 11 °C (see Table 1), and hence  
127 present an opportunity to investigate how the effects of warming and local adaptation interact  
128 to shape the thermal dependence of consumer-resource interactions.

129

### 130 **Grazer metabolism**

131 To quantify whether local adaptation to the different thermal regimes in the two adjacent  
132 streams resulted in divergence in metabolic traits of *R. balthica* we measured the acute  
133 responses of respiration to a broad gradient in temperature. We collected 33 individuals of  
134 similar weight and length from each stream, which were cleaned from any algal debris to  
135 avoid carry-over of a food source into the tank or subsequent respiratory measurements on

136 the oxygen electrode. The snails were kept overnight in aerated tanks at the average stream  
137 temperature of origin and in the absence of a food source to minimise any potential effects of  
138 differences in food quantity or quality between streams. Respiration was quantified as the  
139 rate of oxygen consumption in a Clark-Type oxygen electrode, measured between 4 – 44 °C  
140 in 4 °C increments (11 temperatures in total). At each temperature, respiration was measured  
141 for 3 individuals, and a different set of individuals was measured at each temperature (i.e.  
142 each animal was only subjected to a single assay). Individuals were allowed 15 minutes at the  
143 assay temperature prior to the measurements. The subsequent thermal responses of  
144 respiration were quantified using a modification of the Sharpe-Schoolfield equation (see  
145 Schoolfield *et al.* (1981) for the original equation):

$$146 \ln(b(T)) = E_a \left( \frac{1}{kT_c} - \frac{1}{kT} \right) + \ln(b(T_c)) + \alpha \ln(M_i) - \ln \left( 1 + e^{E_h \left( \frac{1}{kT_h} - \frac{1}{kT} \right)} \right) \quad (1)$$

147 where  $b(T)$ , is the *per capita* metabolic rate ( $\mu\text{mol O}_2 \text{ L}^{-1} \text{ h}^{-1}$ ) at temperature  $T$  in Kelvin (K),  
148  $k$  is Boltzmann's constant ( $8.62 \times 10^{-5} \text{ eV K}^{-1}$ ),  $E_a$  is an apparent activation energy (in eV) for  
149 the metabolic process,  $\ln(b(T_c))$  is the rate of metabolism normalised to an arbitrary  
150 reference temperature,  $T_c = 18 \text{ °C}$ , where no low or high temperature inactivation is  
151 experienced.  $M_i$  is the mass (g) of an individual  $i$ ,  $\alpha$  is the allometric scaling exponent that  
152 characterises the power-law relation of mass and metabolic rate (Brown *et al.* 2004).  $E_h$   
153 characterizes temperature-induced inactivation of enzyme kinetics above  $T_h$  where half the  
154 enzymes are rendered non-functional. Differentiating equation (1) and solving for the global  
155 maxima yields an expression for the optimum temperature

$$156 T_{opt} = \frac{E_h T_h}{E_h + k T_h \ln \left( \frac{E_h}{E_a} - 1 \right)} \quad (2)$$

157 Equation (1) differs from the Sharpe-Schoolfield equation (Sharpe & DeMichele 1977;  
158 Schoolfield *et al.* 1981) in a number of ways. First, we account for the power law relation  
159 between body mass and metabolic rate,  $M^\alpha$  (Brown *et al.* 2004). Second, we exclude

160 parameters from Eq. (1) used to characterize low-temperature inactivation due to insufficient  
161 data to quantify this phenomenon in our analysis. Second, rather than characterize  
162 temperature effects below  $T_{opt}$  using the Eyring (1935) relation,  $\left(\frac{T}{T_c}\right) e^{E_a\left(\frac{1}{kT_c}-\frac{1}{kT}\right)}$ , we instead  
163 use the simpler Boltzmann factor,  $e^{E_a\left(\frac{1}{kT_c}-\frac{1}{kT}\right)}$ . This simplification enables an explicit solution  
164 for  $T_{opt}$  (Eq. 2) and facilitates more direct comparison with previous work on the temperature  
165 dependence of metabolism using metabolic theory (e.g. Gillooly *et al* 2001; Savage *et al*  
166 2004; Brown *et al* 2004; Allen *et al.* 2005).

167         The parameters,  $\ln b(T_c)$ ,  $\alpha$ ,  $E_a$ ,  $E_h$ ,  $T_h$ , and  $T_{opt}$ , in Eqs. (1) & (2) represent traits  
168 characterising the metabolic thermal response that we expect to be under selection in *R.*  
169 *balthica* inhabiting the hot and cold streams. We tested for differences in each of the  
170 parameters between the populations of *R. balthica* by fitting the respiration data to Eq. (1)  
171 using generalised non-linear least squares regression (within the ‘gnls’ function in the ‘nlme’  
172 package for R, package version 3.1-128) and including ‘origin’ as a two level factor (i.e.  
173 ‘cold’ and ‘warm’ stream). We tested for differences between populations for each parameter  
174 by sequentially removing the effect of ‘origin’ on each parameter and comparing the Akaike  
175 information criterion for small sample sizes (AICc) for all possible models (see SI Table 1  
176 and SI Table 2) using the ‘aictab’ and ‘modavg’ functions from the AICcmodavg package  
177 (package version 2.1-0). The model chosen for further exploration was that with the lowest  
178 (AICc) value. Model averaging was carried out when models fell within 2 AICc units of each  
179 other, and the conditional averages of the parameters were used for curve fitting and  
180 interpretation (see also Table 2). The relative importance of the fixed factors in the averaged  
181 model was determined using the sum of their relative weights.

182

183

184 **Reciprocal transplant experiment**

185 The reciprocal transplant experiments to assess the effects of temperature and local  
186 adaptation on algal-grazer interactions were carried out by placing snails in microcosms  
187 consisting of a tissue culture flask on which diatom biofilms had been established. Diatoms  
188 of the genera, *Acnantes*, *Nitzschia*, *Navicula*, and *Gomphonema* are common in streams  
189 across the Hengill volcanic area (Guðmundsdóttir *et al.* 2012) were ordered from culture  
190 collections (Culture collection of algae and protozoa and Sciento) and grown in the  
191 laboratory in mixed assemblages to yield common resource for testing the effects of  
192 temperature and local adaptation on grazing . The diatom assemblages were inoculated into  
193 Corning plastic translucent flasks (maximum volume 1L) with 20 mL COMBO medium  
194 (Kilham *et al.* 1998), and brought to a salinity of 5-10 (equivalent to approximately 5-10 g  
195 salts/kg water) to match the slightly elevated salinity and conductivity found in these thermal  
196 stream environments (Guðmundsdóttir *et al.* 2012). The flasks were turned onto their sides to  
197 allow for a larger area of biofilm growth on the base (~ 60 cm<sup>2</sup> in total per flask) and  
198 communities were left to grow for 14 days prior to the experiment. After 14 days all flasks  
199 had substantial biofilm development on the base and were used as microcosms for the *in situ*  
200 reciprocal transplant experiment. Analysis of control flasks (no grazer) showed that growth of  
201 the diatom lawn *per se* did not differ significantly for flasks placed in hot or cold streams (SI  
202 Figure 2). Thus, any changes to the biofilm biomass in the experiment can be attributed to the  
203 per capita effects of the grazer.

204 The experiment consisted of 3 treatments (each with 6 replicate microcosms placed in  
205 each of the 2 streams): (i) a control microcosm in which a biofilm was present and no *R.*  
206 *balthica* were added, (ii) an ‘origin’ treatment in which *R. balthica* that were resident in the  
207 stream were added to microcosms, and (iii) a ‘transplanted’ treatment in which *R. balthica*  
208 that were from the adjacent stream were added to microcosms. *R. balthica* individuals were  
209 collected from the 2 streams the day before the experiment and were starved for 24h in the



210 laboratory in aerated tanks at the average temperature of the stream of origin. There was no  
211 significant difference in average snail weight between the two streams (see SI Figure 3).  
212 Microcosms were assembled by adding 3 snails of similar body dimensions ( $0.35 \pm 0.03$  g of  
213 *R. balthica* weight reported as blotted fresh weight throughout) and 100 mL of 0.4  $\mu\text{m}$   
214 filtered water from the stream in which the microcosm was to be placed. This resulted in a  
215 grazer density of 5 individuals  $\text{m}^{-2}$ , which was comparable to the average *in situ* density in  
216 the streams (see SI Figure 4). This design was preferred to a set-up with each microcosm  
217 holding a single grazer, which attempt to exclude the effects of mutual interference on  
218 feeding behaviour (e.g. Lang et al. (2011), Skalski and Gilliam (2001), Rall *et al.* (2010);  
219 Vucic-Pestic *et al.* (2011)), because (i) the experimental densities are representative of  
220 natural conditions; and (ii) the consumption rates of a single individual were insufficient to  
221 detect a significant change in algal biomass. The microcosms were submerged in each stream  
222 and the snails were left to graze for 48 hours. We observed no grazer mortality over the  
223 experimental period.

224

### 225 **Interaction strength**

226 At the end of the experiment, algal biomass in each of the microcosms was quantified via  
227 methanol chlorophyll extraction (modified from Holm-Hansen & Riemann (1978)). Here, the  
228 walls of the microcosms were scrubbed until all biofilm particles were in suspension. The  
229 solution was filtered onto a 0.4 $\mu\text{m}$  GF/F filter, which was then ground in methanol for 5  
230 minutes. The samples were centrifuged at 3500 rpm for 15 minutes and the absorbance of the  
231 supernatant was measured at 632nm, 665nm, and 750nm. Total chlorophyll content in  $\mu\text{g}$   
232  $\text{mL}^{-1}$  was then calculated as described in Holm-Hansen & Riemann (1978). The *per capita*  
233 interaction strength in each microcosm was then estimated by calculating the dynamic index  
234 (DI, see also Berlow *et al.* (1999; 2004) for a technically similar set-up):

$$235 \quad DI = \frac{\ln\left(\frac{N}{D}\right)}{Yt} \quad (3)$$

236 where  $N$  is total chlorophyll (sum of Chl  $a$  + Chl  $c$ ) content of control,  $D$  total chlorophyll in  
237 the grazed microcosm,  $Y$  is the grazer biomass (g C), and  $t$  is time in hours. Snail blotted wet  
238 weight was converted to carbon mass (in grams) using conversion factors that assume dry  
239 weight to be 7.5% of the blotted wet weight (Ricciardi & Bourget 1998) and a carbon content  
240 of 22% dry weight (Burgmer *et al.* 2010).

241 We carried out two analyses using the data from the reciprocal transplant experiment.  
242 The first analysis, used a generalised linear model (GLM), with ‘interaction strength’ as the  
243 response variable and ‘origin’ (‘cold’ or ‘warm’ stream) and ‘transplant temperature’ (17.5  
244 and 28.3 °C) as potentially interacting factors. We used this analysis to determine (i) whether  
245 interaction strengths differed between snails that originated from the warm or cold streams  
246 (e.g. a main effect of ‘origin’); (ii) whether interaction strengths were temperature dependent  
247 (e.g. a main effect of ‘temperature’); and (iii) whether the temperature dependence of  
248 interaction strength differed between the snails from the cold and warm streams (e.g.  
249 interaction between ‘origin’ and ‘temperature’). The design of the reciprocal transplant  
250 experiment also enabled us to disentangle short-term temperature responses attributable to  
251 acclimation (e.g. responses to the temperature in the ‘transplanted’ stream) from those  
252 reflecting processes operating over longer, evolutionary time scales (e.g. adaptation to the  
253 temperature in the stream of ‘origin’). The second GLM included ‘interaction strength’ as the  
254 response variable and ‘timescale’ (‘short’ or ‘long’) and ‘transplant temperature’ (17.5 and  
255 28.3 °C) as potentially interacting factors. Here, ‘short-term’ temperature responses were  
256 characterised as the change in interaction strength between the stream of origin and the  
257 transplant stream. By contrast, the ‘long-term’ temperature response was characterised as the  
258 change in interaction strength comparing measurements made only when the snails were in  
259 their stream of origin. We re-express the transplant temperature data as Boltzmann

260 temperatures  $\left(\frac{1}{kT_c} - \frac{1}{kT}\right)$  so that the coefficients of the model yield activation energies in units  
261 of eV (see E. (1)). In this analysis, a significant interaction between ‘transplant temperature’  
262 and ‘timescale’ would demonstrate that the temperature dependence of interaction strength  
263 differs between the ‘short-term’ ( $E_{\text{short}}$ ), and ‘long-term’ ( $E_{\text{long}}$ ). We assume that  $E_{\text{short}}$   
264 captures rapid physiological plasticity (e.g. acclimation) in interaction strength in response to  
265 a change in temperature and  $E_{\text{long}}$  captures both acclimation and adaptation (evolution).  
266 Consequently, the component of the temperature sensitivity attributable to evolution is given  
267 by  $E_{\text{evol}} = E_{\text{long}} - E_{\text{short}}$ .

268

## 269 **RESULTS**

### 270 **Metabolic thermal response curves**

271 The allometric scaling coefficient,  $\alpha$ , and the apparent activation energy,  $E_a$ , were consistent  
272 between the populations of *R. balthica* from the cold and warm streams (see Table 2 for  
273 model comparison and estimated parameter values). The temperature normalised rate of  
274 respiration,  $\ln b(T_c)$ , and  $T_h$  (the temperature at which respiration was 50% inactivated) were  
275 both higher in the population of *R. balthica* from the warm stream. Because the optimum  
276 temperature,  $T_{\text{opt}}$ , depends strongly on  $T_h$  (see Eq. (2)),  $T_{\text{opt}}$  was higher in *R. balthica* from  
277 the warmer stream ( $T_{\text{opt}} \text{ warm} = 38.25 \pm 0.6 \text{ }^\circ\text{C}$ ;  $T_{\text{opt}} \text{ cold} = 33.05 \pm 1.5 \text{ }^\circ\text{C}$ ). As  $\ln b(T_c)$  and  
278  $T_{\text{opt}}$  were both higher, the warm populations of *R. balthica* had elevated *per capita* metabolic  
279 rates across the full range of measurement temperatures (Fig. 2).

280

281

282

### 283 **Local adaptation of interaction strength**

284 Interaction strength increased with elevated transplant temperature for the populations of *R.*  
285 *balthica* from both the warm and the cold streams (Fig. 3; main effect of ‘transplant  
286 temperature’ (GLM,  $t_{1,21}=2.56$ ;  $p<0.01$ ). Furthermore, interaction strengths were consistently  
287 higher for the populations of *R. balthica* from the warm stream in both transplant  
288 temperatures (Fig. 3; GLM main effect of ‘origin’  $t_{1,21} = 2.90$ ;  $p < 0.005$ ). These findings are  
289 consistent with the higher respiration rates observed in the warm population (Fig. 2) and  
290 highlight the association between metabolism and interaction strength.

291

### 292 **Disentangling the effects of acclimation and adaptation on interaction strength**

293 Our experimental design enabled us to compare temperature sensitivities that capture short-  
294 term thermal acclimation (e.g. changes in interaction strength in response to the reciprocal  
295 transplant) as well as the long-term temperature sensitivity, which also includes effects of  
296 local adaptation (e.g. changes in rates between warm and cold populations quantified in the  
297 stream of origin). We found that interaction strength increased with temperature in both the  
298 short- and the long-term (Fig. 3). However, the magnitude of the temperature response was  
299 significantly larger in the long-term (Fig. 3; interaction between ‘transplant temperature’ and  
300 ‘timescale’ on interaction strength; GLM  $t_{1,18} = -2.19$ ;  $p < 0.05$ ), where, the average  $E_{\text{short}}$  was  
301 0.46 eV, while  $E_{\text{long}}$  was significantly higher at 0.99 eV. This divergence between the short-  
302 and long-term temperature sensitivities implies a non-trivial contribution of evolution in  
303 amplifying the effects of temperature on interaction strength *in situ*, with the contribution of  
304  $E_{\text{evol}}$  of 0.51 and 0.53 eV in the cold and warm adapted populations respectively.

305

### 306 **DISCUSSION**

307 Understanding how global warming will affect the strength of consumer-resource interactions  
308 and the stability of aquatic food webs is a fundamental challenge in evolutionary ecology that

309 requires insight on the short-term effects of temperature on metabolism and interaction traits  
310 as well as how these processes are modulated by evolution over longer time scales. There is  
311 evidence from terrestrial (Rall *et al.* 2010; Vucic-Pestic *et al.* 2011; Barton 2011; Brose *et al.*  
312 2012), freshwater (Kratina *et al.* 2012) and marine ecosystems (Sanford 1999), that warming  
313 is likely to increase the strength of consumer-resource interactions, at least in the short-term,  
314 owing to the exponential effects of temperature on the consumption rates of mobile  
315 ectothermic consumers (Dell *et al.* 2014; Gilbert *et al.* 2014). What is less clear however, is  
316 how rapid evolutionary adaptation to rising temperatures will modulate the direct effects of  
317 warming on species interactions. Space-for-time substitutions across broad spatial scales  
318 indicate that local adaptation to different thermal regimes can play an important role in  
319 shaping species interactions, often compensating for the direct effects of temperature on  
320 interaction traits (Barton 2011; De Block *et al.* 2012). Here, we build on this work by  
321 investigating the effects of temperature and local adaptation on the interaction between the  
322 gastropod grazer, *R. balthica*, and its algal resource. Our study contributes novel insights in a  
323 number of ways. First, we explore patterns of local adaptation over a relatively small spatial  
324 scale (m as opposed to km). The two streams in our experiment are separated by  
325 approximately 500 m but differ in temperature by 11 °C. Because dispersal, gene flow and  
326 genetic divergence among populations in this species are strongly related to geographic  
327 distance (Johansson *et al.* 2016), our study over a relatively small spatial scale, provides  
328 insight into how closely related natural populations evolve in response to warming and is  
329 therefore directly relevant for understanding adaptation to climate change (Richter-Boix *et al.*  
330 2010; Keller *et al.* 2013; Merilä and Hendry 2014). Second, we quantified the effects of  
331 temperature on both metabolic and consumption rates to determine the mechanisms  
332 underpinning patterns of thermal adaptation and their influence on the strength of consumer-  
333 resource interactions.

334 We found significant variation in the thermal response curves for respiration between  
335 the populations of *R. balthica* from the warm and cold streams. The optimum temperature  
336 ( $T_{\text{opt}}$ ) for respiration was higher in the warm population (i.e. metabolic rates peaked at higher  
337 temperatures). Furthermore, the inactivation energy ( $E_h$ ) was lower in the warm population,  
338 indicating that declines in the rate of respiration after the optimum (i.e. at high temperatures)  
339 were less pronounced than in grazers from the cold stream, where metabolic rates peaked at  
340 lower temperatures and declined markedly at temperatures above  $T_{\text{opt}}$ . These divergences in  
341 metabolic traits suggest that the metabolism of the warm and cold populations of *R. balthica*  
342 reflect local adaptation to the different thermal regimes in these streams. Whilst the higher  
343  $T_{\text{opt}}$  and lower  $E_h$  in the warm population were in line with expectations assuming local  
344 thermal adaptation, we found no evidence that metabolic performance at high temperature  
345 was traded-off against performance at low temperature. Instead, metabolic rates were higher  
346 for *R. balthica* from the warm stream across all measurement temperatures. These results are  
347 in broad agreement with the “hotter is better” hypothesis, which proposes that maximal  
348 performance of organisms with higher optimal temperatures should be greater than those with  
349 lower optimum temperatures because of the thermodynamic constraints imposed by high  
350 temperatures on enzyme kinetics (Huey and Kingsolver 1993; Kingsolver *et al.* 2004;  
351 Angilletta *et al.* 2010). Indeed maximal respiration rates in the population from the warm  
352 stream were greater than those from the cool (warm stream:  $8.26 \pm 0.41 \mu\text{mol O}_2 \text{ L}^{-1} \text{ h}^{-1}$ , cool  
353 stream:  $7.3 \pm 0.22 \mu\text{mol O}_2 \text{ L}^{-1} \text{ h}^{-1}$ ). The lower  $E_h$ , (i.e. the steepness of the decline of the  
354 thermal reaction norm past the optimum), and higher  $\ln b(T_c)$ , i.e. the rate of respiration  
355 normalised to 18 °C, in the warm population also meant that the thermal response curve for *R.*  
356 *balthica* from the warm stream was broader. In agreement with previous work (e.g. on  
357 bacteriophages, Knies *et al.* (2009)), our data for the gastropod *R. balthica* indicate that  
358 adaptation to higher temperatures resulted in both greater maximal metabolic performance

359 and a broader metabolic thermal reaction norm.

360           The general patterns observed in the metabolic traits were also reflected in the effects  
361 of temperature on interaction strength. Interaction strength was higher for individuals placed  
362 in the warm stream, irrespective of their stream of origin. These findings suggest that  
363 elevated temperatures increase consumption rates though the effects of temperature on  
364 respiratory physiology, but local adaptation to warmer environments also results in a  
365 correlated increase in metabolism and interaction strength at low temperature. This may have  
366 important wider implications for the effects of warming on the structure, functioning and  
367 stability of aquatic food webs (Rall *et al.* 2010; O'Connor *et al.* 2011; Vucic-Pestic *et al.*  
368 2011; Dell *et al.* 2014; Fussmann *et al.* 2014; Gilbert *et al.* 2014, Fussmann *et al.* 2017). If  
369 adaptive responses to increasing temperature give rise to higher maximal rates of metabolism  
370 and consumption as well as elevating rates at lower temperatures, then the effects of warming  
371 on the strength of consumer-resource interactions in the long-term could be greater than  
372 previously anticipated (Gilbert *et al.* 2014). Indeed, work on experimental warming of  
373 aquatic ecosystems has shown that increases in the strength of top-down control can have  
374 profound effects on community structure and ecosystem processes (Burgmer and Hillebrand  
375 2011; Kratina *et al.* 2012; Yvon-Durocher *et al.* 2015). Elevated grazing rates at warmer  
376 temperatures can have a wide range of impacts in aquatic systems, with evidence for both  
377 increases (Yvon-Durocher *et al.* 2015) and decreases (Burgmer and Hillebrand 2011) in algal  
378 species richness, biomass and productivity.

379           In our experiments, the thermal sensitivities of metabolic rates were much larger than  
380 those of interaction strengths in the short-term (e.g. 0.96 and 0.45 eV respectively), in line  
381 with findings in other invertebrate systems (Rall *et al.* 2010; Vucic-Pestic *et al.* 2011;  
382 Fussmann *et al.* 2014). These findings suggest that rates of grazing and metabolism were  
383 clearly linked, but became decoupled when individuals experience rapid changes in

384 temperature that depart substantially from those in their local environment. In the short-term,  
385 if increases in metabolic demands with temperature are greater than those of consumption  
386 rates (as found here), then less energy will be transferred from the resource to the consumer  
387 (i.e. more is lost through respiration, see also Rall *et al.* 2010). If such imbalances are  
388 maintained over long periods of time then starvation of the consumer can ultimately result in  
389 a decline in top-down control on the resource (Fussman *et al.* 2014, Binzer *et al.* 2016).  
390 However, when consumers' feeding rates are more sensitive to temperature than metabolic  
391 rates, interaction strengths can become amplified in warmer environments, leading to faster  
392 resource depletion and eventually driving either the resource or the consumer to extinction  
393 (Vasseur & McCann 2005). Long-term effects of temperature on interaction strengths have so  
394 far only been explored using food web models, parameterised using temperature sensitivities  
395 derived from short-term experiments (Vasseur & McCann 2005; Rall *et al.* 2010; Fussman *et*  
396 *al.* 2014). Consequently, such analyses don't capture the capacity for thermal adaptation to  
397 modulate *per capita* rates. Our results highlight substantial differences between the short- and  
398 long-term effects of temperature on interaction strength; implying that thermal adaptation  
399 plays an important role in maintaining the balance between metabolic and consumption rates  
400 over the long-term.

401         We quantified the effects of local adaptation (evolution) on interaction strength by  
402 comparing the short- and long-term effects of temperature in the reciprocal transplant  
403 experiment. The short-term temperature response ( $E_{\text{short}}$ ) captures the effects of physiological  
404 plasticity over the 48h experiment. Conversely, the long-term response ( $E_{\text{long}}$ ) also accounts  
405 for processes operating over longer, evolutionary timescales. The  $E_{\text{long}}$  value was higher than  
406  $E_{\text{short}}$ , implying a significant role for evolution in shaping the effects of temperature on *in situ*  
407 interaction strengths. Notably, the higher  $E_{\text{long}}$  was driven both by elevated grazing rates in  
408 the warm populations in the warm stream and lower rates in the cold populations in the cold



409 stream. These results diverge from expectations based on the metabolic cold adaptation  
410 hypothesis (Addo-Bediako *et al.* 2002) which would predict adaptation to higher  
411 temperatures should dampen the acute effects of temperature on metabolic rates. On the  
412 contrary, our results suggest that adaptation to warming amplified the effects of temperature  
413 on metabolic as well as grazing rates. The lower interaction strengths in the population of *R.*  
414 *balthica* locally adapted to the colder stream highlight that evolution can have unexpected  
415 effects on species interactions. The evolutionary maintenance of lower than anticipated  
416 grazing rates in the cold stream could be selected for since lower grazing rates might result in  
417 greater food chain stability and/or stoichiometric homeostasis (Sterner & Elser 2002, Cross *et*  
418 *al.* 2005; 2015) under the prevailing temperature regime. Thus, understanding the impacts of  
419 environmental change on the strength of consumer-resource interactions over timescales that  
420 are relevant to the rate of climate change (e.g. gradual warming over decades) will require an  
421 appreciation both of the direct effects of rising temperatures on species interactions and the  
422 reciprocal feedback between ecological and evolutionary dynamics (Fussmann *et al.* 2007;  
423 Gravel *et al.* 2010; Loeuille 2010; Urban 2013; Barraclough 2015)

424

## 425 **Conclusions**

426 We used a natural geothermal temperature gradient to investigate how warming influences  
427 the strength of algal-grazer interactions via the direct effects of temperature on metabolism  
428 and consumption, and indirect feedbacks through evolutionary adaptation. Metabolic rates  
429 and interaction strength increased with temperature in the same way for both the warm- and  
430 cold-adapted populations of *R. balthica*, suggesting that rapid changes in temperature have a  
431 consistent effect on interactions between mobile consumers and sessile resources, mediated  
432 by the effects of temperature on consumer metabolic rates (Dell *et al.* 2014). However, the  
433 warm-adapted populations had higher metabolic and grazing rates across all measurement

434 temperatures compared to their cold-adapted counterparts. These findings are consistent with  
435 the ‘hotter is better and broader’ hypothesis (Huey and Kingsolver 1993; Knies *et al.* 2009;  
436 Angilletta *et al.* 2010) (e.g. adaptation to warming gives rise to higher maximal metabolic  
437 rates and broader thermal reaction norms). In consequence, our results suggest that warming  
438 could increase the strength of algal-grazer interactions, which are often ‘keystone’  
439 interactions in aquatic systems, both via the thermodynamic effects of higher temperatures on  
440 enzyme kinetics and through correlated increases in *per capita* metabolism and consumption  
441 as organisms adapt to warmer temperatures.

442

#### 443 **Conflict of interest**

444 The authors declare no conflict of interest

445

#### 446 **Acknowledgments**

447 The authors thank Eoin O’Gorman for comments on an earlier version of this manuscript.

448 This study was funded by a Leverhulme Trust research grant (RPG-2013-335), and an ERC  
449 starting grant (ERC-StG 677278) awarded to GYD; and the University of Exeter.

450

#### 451 **References**

452 Addo-Bediako, A., S. L. Chown, and K. J. Gaston. 2002. Thermal tolerance, climatic

453 variability, and latitude. *Proceedings of the Royal Society B: Biological Sciences* 267:739–

454 745.

455 Allen, A.P., Gillooly, J.F. & Brown, J.H. (2005). Linking the global carbon cycle to

456 individual metabolism. *Funct. Ecol.*, 19, 202–213.

457 Angilletta, M. J., Jr, R. B. Huey, and M. R. Frazier. 2010. Thermodynamic Effects on

458 Organismal Performance: Is Hotter Better? *Physiological and Biochemical Zoology* 83:197–

459 206.

- 460 Angilletta, M. J., Jr, R. S. Wilson, C. A. Navas, and R. S. James. 2003. Tradeoffs and the  
461 evolution of thermal reaction norms. *Trends in Ecology & Evolution* 18:234–240.
- 462 Barraclough, T. G. 2015. How Do Species Interactions Affect Evolutionary Dynamics Across  
463 Whole Communities? *Annual Review of Ecology, Evolution, and Systematics* 46:25–48.
- 464 Barton, B. T. 2011 Local adaptation to temperature conserves top-down control in a  
465 grassland food web. *Proceedings of the Royal Society B: Biological Sciences* 278:3102–  
466 3107.
- 467 Berlow, E. L., A. M. Neutel, J. E. Cohen, P. C. De Ruiter, B. Ebenman, M. Emmerson, J. W.  
468 Fox, et al. 2004. Interaction strengths in food webs: issues and opportunities. *Journal of*  
469 *Animal Ecology* 73:585–598.
- 470 Berlow, E. L., S. A. Navarrete, C. J. Briggs, M. E. Power, and B. A. Menge. 1999.  
471 Quantifying Variation in the Strengths of Species Interactions. *Ecology* 80:2206.
- 472 Binzer, A., C. Guill, B. C. Rall, and U. Brose. 2016. Interactive effects of warming,  
473 eutrophication and size structure: impacts on biodiversity and food-web structure. *Global*  
474 *Change Biology* 22:220–227.
- 475 Brose, U., J. A. Dunne, J. M. Montoya, O. L. Petchey, F. D. Schneider, and U. Jacob. 2012.  
476 Climate change in size-structured ecosystems. *Philosophical Transactions of the Royal*  
477 *Society B: Biological Sciences* 367:2903–2912.
- 478 Burgmer, T., and H. Hillebrand. 2011. Temperature mean and variance alter phytoplankton  
479 biomass and biodiversity in a long-term microcosm experiment. *Oikos* 120:922–933.
- 480 Burgmer, T., J. Reiss, S. A. Wickham, and H. Hillebrand. 2010. Effects of snail grazers and  
481 light on the benthic microbial food web in periphyton communities. *Aquatic Microbial*  
482 *Ecology* 61:163–178.
- 483 Cross, W. F., J. M. Hood, J. P. Benstead, A. D. Huryn, and D. Nelson. 2015. Interactions  
484 between temperature and nutrients across levels of ecological organization. *Global Change*

- 485 Biology 21:1025–1040.
- 486 Cross, W. F., J. P. Benstead, P. C. FROST, and S. A. Thomas. 2005. Ecological  
487 stoichiometry in freshwater benthic systems: recent progress and perspectives. *Freshwater*  
488 *Biology* 50:1895–1912.
- 489 De Block, M., K. Pauwels, M. Van Den Broeck, L. DE Meester, and R. Stoks. 2012*a*. Local  
490 genetic adaptation generates latitude-specific effects of warming on predator-prey  
491 interactions. *Global Change Biology* 19:689–696.
- 492 Dell, A. I., S. Pawar, and V. M. Savage. 2011. Systematic variation in the temperature  
493 dependence of physiological and ecological traits. *Proceedings of the National Academy of*  
494 *Sciences* 108:10591–10596.
- 495 Dell, A. I., S. Pawar, and V. M. Savage. 2014. Temperature dependence of trophic  
496 interactions are driven by asymmetry of species responses and foraging strategy. *J Anim Ecol*  
497 83:70–84.
- 498 Deutsch, C. A., J. J. Tewksbury, R. B. Huey, K. S. Sheldon, C. K. Ghalambor, D. C. Haak,  
499 and P. R. Martin. 2008. Impacts of climate warming on terrestrial ectotherms across latitude.  
500 *Proceedings of the National Academy of Sciences* 105:6668–6672.
- 501 Englund, G., G. Öhlund, C. L. Hein, and S. Diehl. 2011. Temperature dependence of the  
502 functional response. *Ecology Letters* 14:914–921.
- 503 Eyring (1935) *J. them. Phys.* 3, 107.
- 504 Fukami, T., and D. A. Wardle. 2005. Long-term ecological dynamics: reciprocal insights  
505 from natural and anthropogenic gradients. *Proceedings of the Royal Society B: Biological*  
506 *Sciences* 272:2105–2115.
- 507 Fussmann, G. F., M. Loreau, and P. A. Abrams. 2007. Eco-evolutionary dynamics of  
508 communities and ecosystems. *Functional Ecology* 21:465–477.
- 509 Fussmann, K. E., F. Schwarzmüller, U. Brose, A. Jousset, and B. C. Rall. 2014. Ecological

- 510 stability in response to warming. *Nature Climate Change* 4:206–210.
- 511 Fussmann, K.E., Rosenbaum, R., U. Brose, Rall, B. 2017 Interactive effects of shifting body  
512 size and feeding adaptation drive interaction strengths of protist predators under warming  
513 bioRxiv 101675; doi: <https://doi.org/10.1101/101675>
- 514 Gilbert, B., T. D. Tunney, K. S. McCann, J. P. DeLong, D. A. Vasseur, V. Savage, J. B.  
515 Shurin, et al. 2014. A bioenergetic framework for the temperature dependence of trophic  
516 interactions. (T. Wootton, ed.)*Ecology Letters* 17:902–914.
- 517 Gilchrist, G. W. 1995. Specialists and Generalists in Changing Environments. I. Fitness  
518 Landscapes of Thermal Sensitivity*The American Naturalist* 146:252–270.
- 519 Gillooly, J.F., Brown, J.H., West, G.B., Savage, V.M. & Charnov, E.L.2001.  
520 Effects of size and temperature on metabolic rate. *Science*, 293, 2248–2251.
- 521 Gravel, D., T. Bell, C. Barbera, T. Bouvier, T. Pommier, P. Venail, and N. Mouquet. 2010.  
522 Experimental niche evolution alters the strength of the diversity-productivity relationship.  
523 *Nature* 469:89–92.
- 524 Hoffmann, A. A., and C. M. Sgrò. 2011. Climate change and evolutionary adaptation. *Nature*  
525 470:479–485.
- 526 Huey, R. B., and J. G. Kingsolver. 1993. Evolution of Resistance to High Temperature in  
527 Ectotherms. *The American Naturalist* 142:S21–S46.
- 528 Johansson, M. P., M. Quintela, and A. Laurila. 2016. Genetic divergence and isolation by  
529 thermal environment in geothermal populations of an aquatic invertebrate. *Journal of*  
530 *Evolutionary Biology* 29 (9), 1701-1712
- 531 Keller, I., J. M. Alexander, R. Holderegger, and P. J. Edwards. 2013. Widespread phenotypic  
532 and genetic divergence along altitudinal gradients in animals. *Journal of Evolutionary*  
533 *Biology* 26:2527–2543.
- 534 Kingsolver, J. G., and R. B. Huey. 2008. Size, temperature, and fitness: three rules.

- 535 Evolutionary Ecology Research 10:251–268.
- 536 Kingsolver, J. G., G. J. Ragland, and J. G. Shlichta. 2004. Quantitative genetics of continuous  
537 reaction norms: thermal sensitivity of caterpillar growth rates. *Evolution*.
- 538 Knies, J. L., J. G. Kingsolver, and C. L. Burch. 2009*a*. Hotter Is Better and Broader: Thermal  
539 Sensitivity of Fitness in a Population of Bacteriophages. *The American Naturalist* 173:419–  
540 430.
- 541 Knies, J. L., J. G. Kingsolver, and C. L. Burch. 2009*b*. Hotter is better and broader: thermal  
542 sensitivity of fitness in a population of bacteriophages. *The American Naturalist* 173:419–  
543 430.
- 544 Kratina, P., H. S. Greig, and P. L. Thompson. 2012. Warming modifies trophic cascades and  
545 eutrophication in experimental freshwater communities. *Ecology* 93:1421–1430.
- 546 Lang, B., B. C. Rall, and U. Brose. 2011. Warming effects on consumption and intraspecific  
547 interference competition depend on predator metabolism. *Journal of Animal Ecology* 81:516–  
548 523.
- 549 Laufkötter, C., M. Vogt, N. Gruber, M. Aita-Noguchi, O. Aumont, L. Bopp, E. Buitenhuis, et  
550 al. 2015. Drivers and uncertainties of future global marine primary production in marine  
551 ecosystem models. *Biogeosciences* 12:6955–6984.
- 552 Levins, R. 1968. Evolution in changing environments: some theoretical explorations.
- 553 Loarie, S. R., P. B. Duffy, H. Hamilton, G. P. Asner, C. B. Field, and D. D. Ackerly. 2009.  
554 The velocity of climate change. *Nature* 462:1052–1055.
- 555 Loeuille, N. 2010. Influence of evolution on the stability of ecological communities. *Ecology*  
556 *Letters* 13:1536–1545.
- 557 Lynch, M., and W. Gabriel. 1987. Environmental tolerance. *American Naturalist*.
- 558 McCann, K., A. Hastings, and G. R. Huxel. 1998. Weak trophic interactions and the balance  
559 of nature. *Nature* 395:794–798.

- 560 May, R.M. (1973). Qualitative stability in model ecosystems. *Ecology*, 54, 638–641
- 561 Merilä, J., and A. P. Hendry. 2014. Climate change, adaptation, and phenotypic plasticity: the  
562 problem and the evidence. *Evolutionary Applications* 7:1–14.
- 563 O'Connor, M. I. 2009. Warming strengthens an herbivore–plant interaction. *Ecology* 90:388–  
564 398.
- 565 O'Connor, M. I., B. Gilbert, and C. J. Brown. 2011. Theoretical predictions for how  
566 temperature affects the dynamics of interacting herbivores and plants. *The American*  
567 *Naturalist* 178:626–638.
- 568 O'Gorman, E. J., D. E. Pichler, G. Adams, J. P. Benstead, H. Cohen, N. Craig, W. F. Cross, et  
569 al. 2012. Impacts of Warming on the Structure and Functioning of Aquatic Communities:  
570 Individual- to Ecosystem-Level Responses. *Advances in Ecological Research* (1st ed., Vol.  
571 47). Elsevier Ltd.
- 572 Otto, S. B., B. C. Rall, and U. Brose. 2007. Allometric degree distributions facilitate food-  
573 web stability. *Nature* 450:1226–1229.
- 574 Paine, R. T. 1980. Food webs: linkage, interaction strength and community infrastructure.  
575 *Journal of Animal Ecology* 49:666.
- 576 Rall, B. C., O. Vucic-Pestic, R. B. Ehnes, M. Emmerson, and U. Brose. 2010. Temperature,  
577 predator-prey interaction strength and population stability. *Global Change Biology* 16:2145–  
578 2157.
- 579 Rall, B. C., U. Brose, M. Hartvig, G. Kalinkat, F. Schwarzmuller, O. Vucic-Pestic, and O. L.  
580 Petchey. 2012. Universal temperature and body-mass scaling of feeding rates. *Philosophical*  
581 *Transactions of the Royal Society B: Biological Sciences* 367:2923–2934.
- 582 Richter-Boix, A., C. Teplitsky, B. Rogell, and A. Laurila. 2010. Local selection modifies  
583 phenotypic divergence among *Rana temporaria* populations in the presence of gene flow.  
584 *Molecular Ecology* 19:716–731.

- 585 Sanford, E. 1999. Regulation of keystone predation by small changes in ocean temperature.  
586 Science 283:2095–2097.
- 587 Savage, V.M., Gillooly, J.F., Brown, J.H., West, G.B. & Charnov, E.L. 2004.  
588 Effects of body size and temperature on population growth. Am. Nat., 163, 429–  
589 441. Schoolfield, R. M., P. J. H. Sharpe, and C. E. Magnuson. 1981. Non-linear regression of  
590 biological temperature-dependent rate models based on absolute reaction-rate theory. Journal  
591 of Theoretical Biology 88:719–731.
- 592 Sharpe & DeMichele 1977
- 593 Sentis, A., J. Morisson, and D. S. Boukal. 2015. Thermal acclimation modulates the impacts  
594 of temperature and enrichment on trophic interaction strengths and population dynamics.  
595 Global Change Biology 21:3290–3298.
- 596 Shurin, J. B., J. L. Clasen, H. S. Greig, P. Kratina, and P. L. Thompson. 2012. Warming  
597 shifts top-down and bottom-up control of pond food web structure and function.  
598 Philosophical Transactions of the Royal Society B: Biological Sciences 367:3008–3017.
- 599 Skalski, G. T., and J. F. Gilliam. 2001. Functional responses with predator interference:  
600 viable alternatives to the holling type ii model Ecology 82:3083.
- 601 Sterner, R.W & Elser, J.J (2002) Ecological Stoichiometry: The Biology of Elements from  
602 Molecules to the Biosphere, *Princeton University press*
- 603 Urban, M. C. 2013. Evolution mediates the effects of apex predation on aquatic food webs.  
604 Proceedings of the Royal Society B: Biological Sciences 280:20130859–20130859.
- 605 Vasseur, D. A., and K. S. McCann. 2005. A mechanistic approach for modeling temperature-  
606 dependent consumer-resource dynamics. The American Naturalist 166:184–198.
- 607 Verges, A., P. D. Steinberg, M. E. Hay, A. G. B. Poore, A. H. Campbell, E. Ballesteros, K. L.  
608 Heck, et al. 2014. The tropicalization of temperate marine ecosystems: climate-mediated  
609 changes in herbivory and community phase shifts. Proceedings of the Royal Society B:



610 Biological Sciences 281:20140846–20140846.

611 Vergés, A., C. Doropoulos, H. A. Malcolm, M. Skye, M. Garcia-Pizá, E. M. Marzinelli, A.

612 H. Campbell, et al. 2016. Long-term empirical evidence of ocean warming leading to

613 tropicalization of fish communities, increased herbivory, and loss of kelp. Proceedings of the

614 National Academy of Sciences 113:13791–13796.

615 Vucic-Pestic, O., R. B. Ehnes, and B. C. Rall. 2011. Warming up the system: higher predator

616 feeding rates but lower energetic efficiencies. . *Global Change Biology*, 17: 1301–1310.

617 doi:10.1111/j.1365-2486.2010.02329.x

618 West, D. C., and D. M. Post. 2016. Impacts of warming revealed by linking resource growth

619 rates with consumer functional responses. (S. Behmer, ed.)*Journal of Animal Ecology*

620 85:671–680.

621 Yvon-Durocher, G., A. P. Allen, M. Cellamare, M. Dossena, K. J. Gaston, M. Leitaó, J. M.

622 Montoya, et al. 2015. Five Years of Experimental Warming Increases the Biodiversity and

623 Productivity of Phytoplankton. (S. A. Levin, ed.)*PLoS Biology* 13:e1002324–22.

624

625

626 **Tables**

627 **Table 1. Physical and chemical characteristics of the streams.** Temperature data were  
628 collected over a 3-day period. All other parameters were collected on the first day of the day  
629 of the experiment. Temperature displayed as means  $\pm$  1SD. All other data were collected for  
630 correlation with temperature across the entire catchment area (all 11 streams), i.e. replication  
631 was on the level of stream identity.

| <b>Parameter</b>                    | <b>Stream 5</b> | <b>Stream 11 A</b> |
|-------------------------------------|-----------------|--------------------|
| <b>Average Temperature (5 days)</b> | 17.5 $\pm$ 4.5  | 28.3 $\pm$ 1.3     |
| <b>pH</b>                           | 7.63            | 7.17               |
| <b>Conductivity</b>                 | 273.6           | 235.7              |
| <b>NO<sub>2</sub></b>               | 0.22            | 0.24               |
| <b>NO<sub>3</sub></b>               | 0.57            | 0.29               |
| <b>NH<sub>4</sub></b>               | 0.17            | 0.19               |
| <b>PO<sub>4</sub></b>               | 0.27            | 0.35               |

632

633

634 **Table 2. Parameter estimates and output from the best fitting gnl model to the thermal**  
 635 **response curves of respiration rates.** Differences in treatments are given in **bold**. Parameter  
 636 estimates are taken from the model along with their standard deviations ( $\pm$  1SD). C = cold  
 637 stream. W = warm stream. See Supporting Information for details on model selection and  
 638 information on AICsc scores for all possible models. Here, the model average of the  
 639 conditional average output for the four best models (within 2 AICc units of each other) is  
 640 displayed.

| <b>Non-linear mixed model output for respiration rates (R)</b> |                   |             |
|----------------------------------------------------------------|-------------------|-------------|
| Treatment effect on                                            | Estimate          | $\pm$ 1SD   |
| $E_a$<br><b>ln <math>R(T_c)</math></b>                         | C: 0.96           | 0.06        |
|                                                                | <b>C: 6.833</b>   | <b>0.18</b> |
|                                                                | <b>W: 7.06</b>    | <b>0.13</b> |
| $E_h$                                                          | <b>C: 5.01</b>    | <b>0.97</b> |
|                                                                | <b>W: 3.16</b>    | <b>0.96</b> |
| $T_h$ [K]<br>(°C)                                              | C: 307.16 (34.01) | 0.94        |
|                                                                | <b>W: 314.15</b>  | <b>1.69</b> |
|                                                                | <b>(41.00)</b>    | <b>0.78</b> |
| $\alpha$                                                       | 0.36              | 0.03        |

641  
 642

643

644 **Figure 1: Map and experimental set-up. Top panel:** The catchment area, with streams used in this experiment indicated by black (for the  
645 colder stream 5 with  $17.5\text{ }^{\circ}\text{C} \pm 4.5\text{ }^{\circ}\text{C}$ ) and red (for the warmer stream 11A with  $28.3\text{ }^{\circ}\text{C} \pm 1.3\text{ }^{\circ}\text{C}$ ) snail icons. **Lower panel:** Schematic  
646 overview of experimental set-up for the grazing experiment.

647

648 **Figure 2 Thermal response curves for respiration.** Thermal response curves of respiration rates as a function of increasing temperature for  
649 populations of the snail *Radix balthica* from the cold (black) and warm (red) stream. Lines are derived from fitting a modified Sharpe-Schoolfield  
650 equation (see methods) to the rate data. Snails from the warm stream have higher temperature normalised metabolic rates ( $\ln R(T_c)$ ) at all  
651 measurement temperatures and have higher optimal temperatures ( $T_{opt}$ ), than snails from the cold stream. The inactivation energy ( $E_h$ ) is lower in  
652 snails from the warm stream, resulting in a curve that is both broader and elevated in comparison to the thermal response curve of respiration for  
653 snails from the cold stream.

654

655 **Figure 3 Long-term and short-term effects of stream temperature on interaction strength and metabolic rates.** Long-term and short-term  
656 effects of temperature in interaction strength measured via the dynamic index. Populations originating from the warm stream have stronger  
657 interaction strength indices in all environments and the highest dynamic index overall was found for snails from the warm stream in their  
658 original environment. Interaction strength increased with temperature both in the short-term ( $E_{short}$ , dashed blue lines) and in the long-term ( $E_{long}$ ,  
659 solid blue line), with  $E_{long}$  significantly greater than  $E_{short}$ . Black boxplots for snails from the colder stream, while red denotes snails from the  
660 warmer stream.

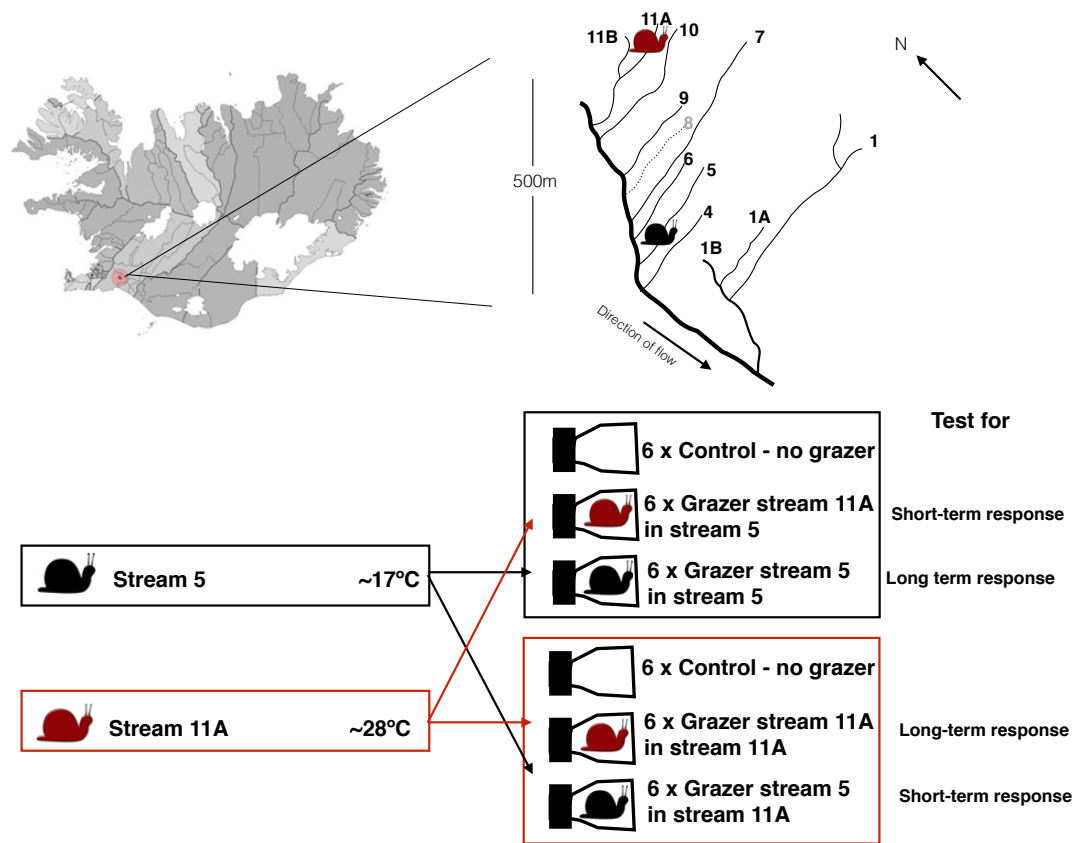

649

650 **Figure 1: Map and experimental set-up.** Top panel: The catchment area, with streams used in this experiment indicated by black (for the  
 651 colder stream 5 with  $17.5\text{ }^{\circ}\text{C} \pm 4.5\text{ }^{\circ}\text{C}$ ) and red (for the warmer stream 11A with  $28.3\text{ }^{\circ}\text{C} \pm 1.3\text{ }^{\circ}\text{C}$ ) snail icons. Lower panel: Schematic  
 652 overview of experimental set-up for the grazing experiment.

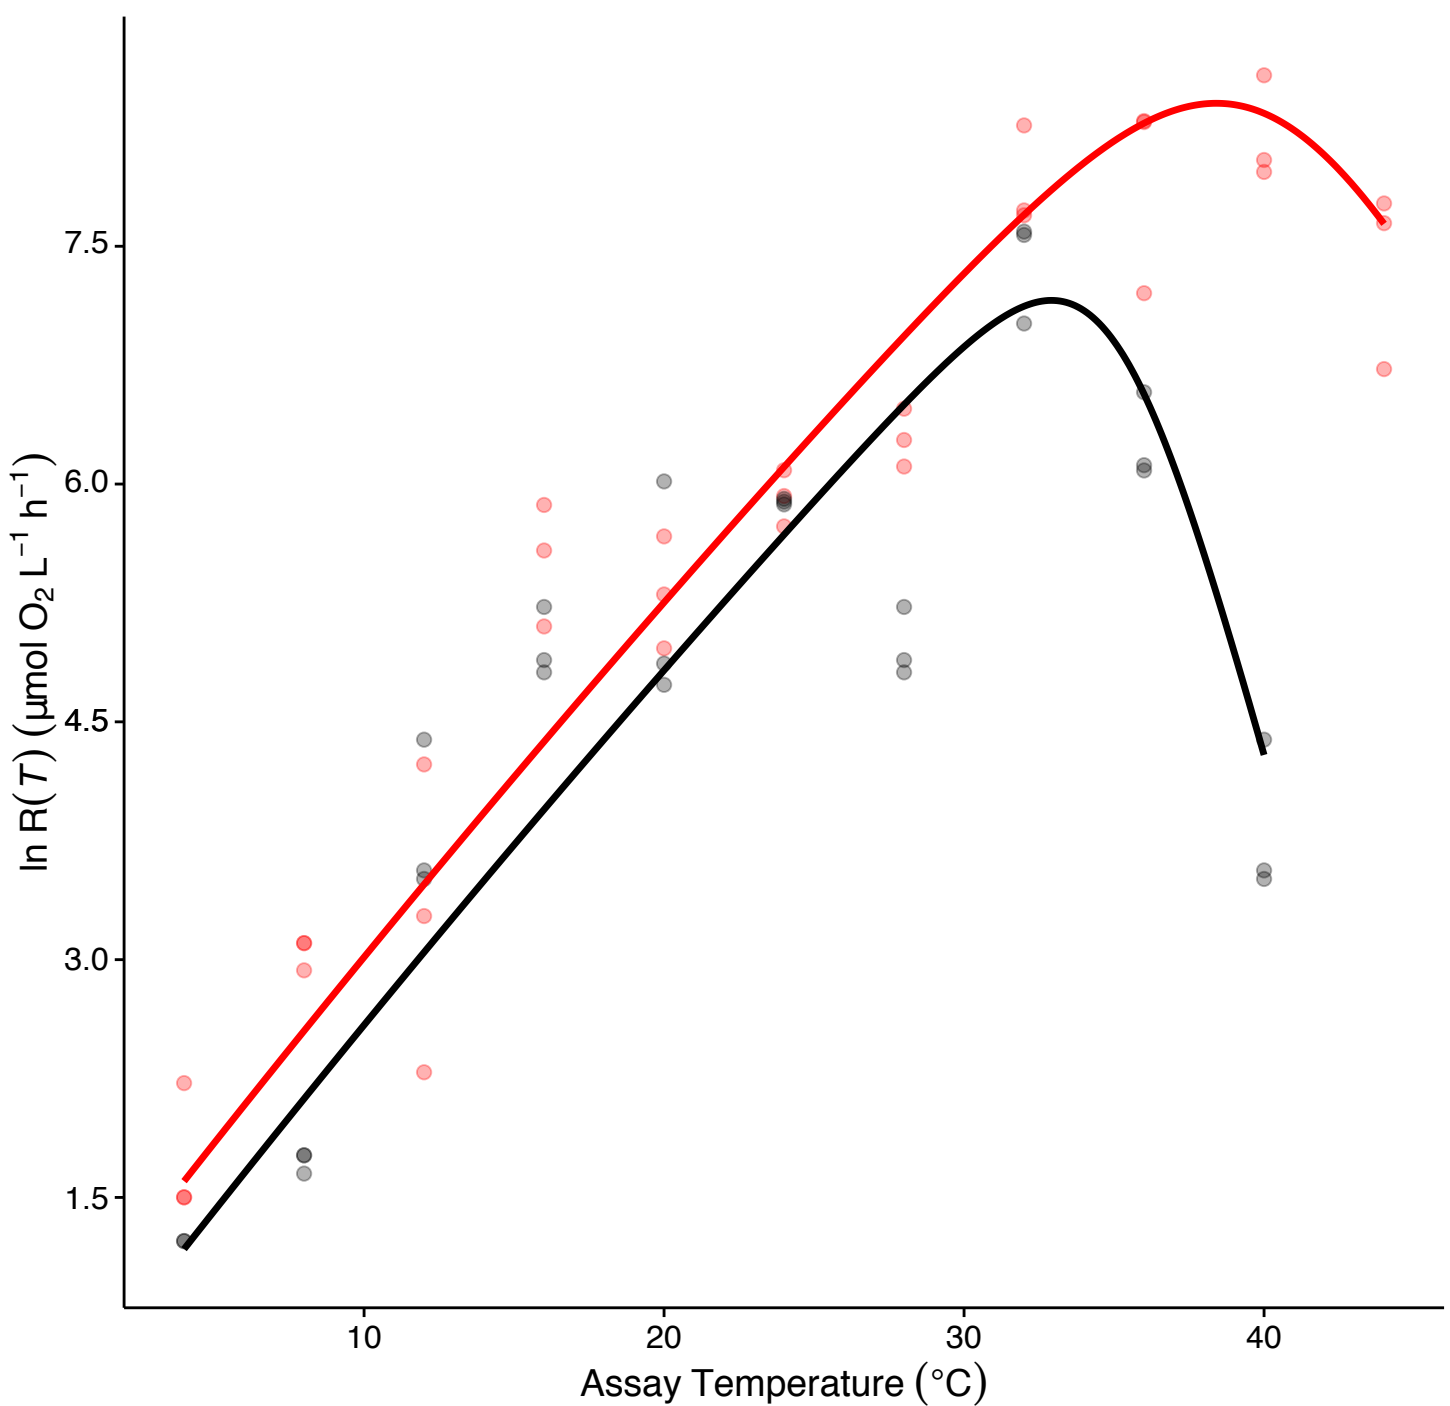

Origin temperature (°C)    ■ 17.5    ■ 28.3

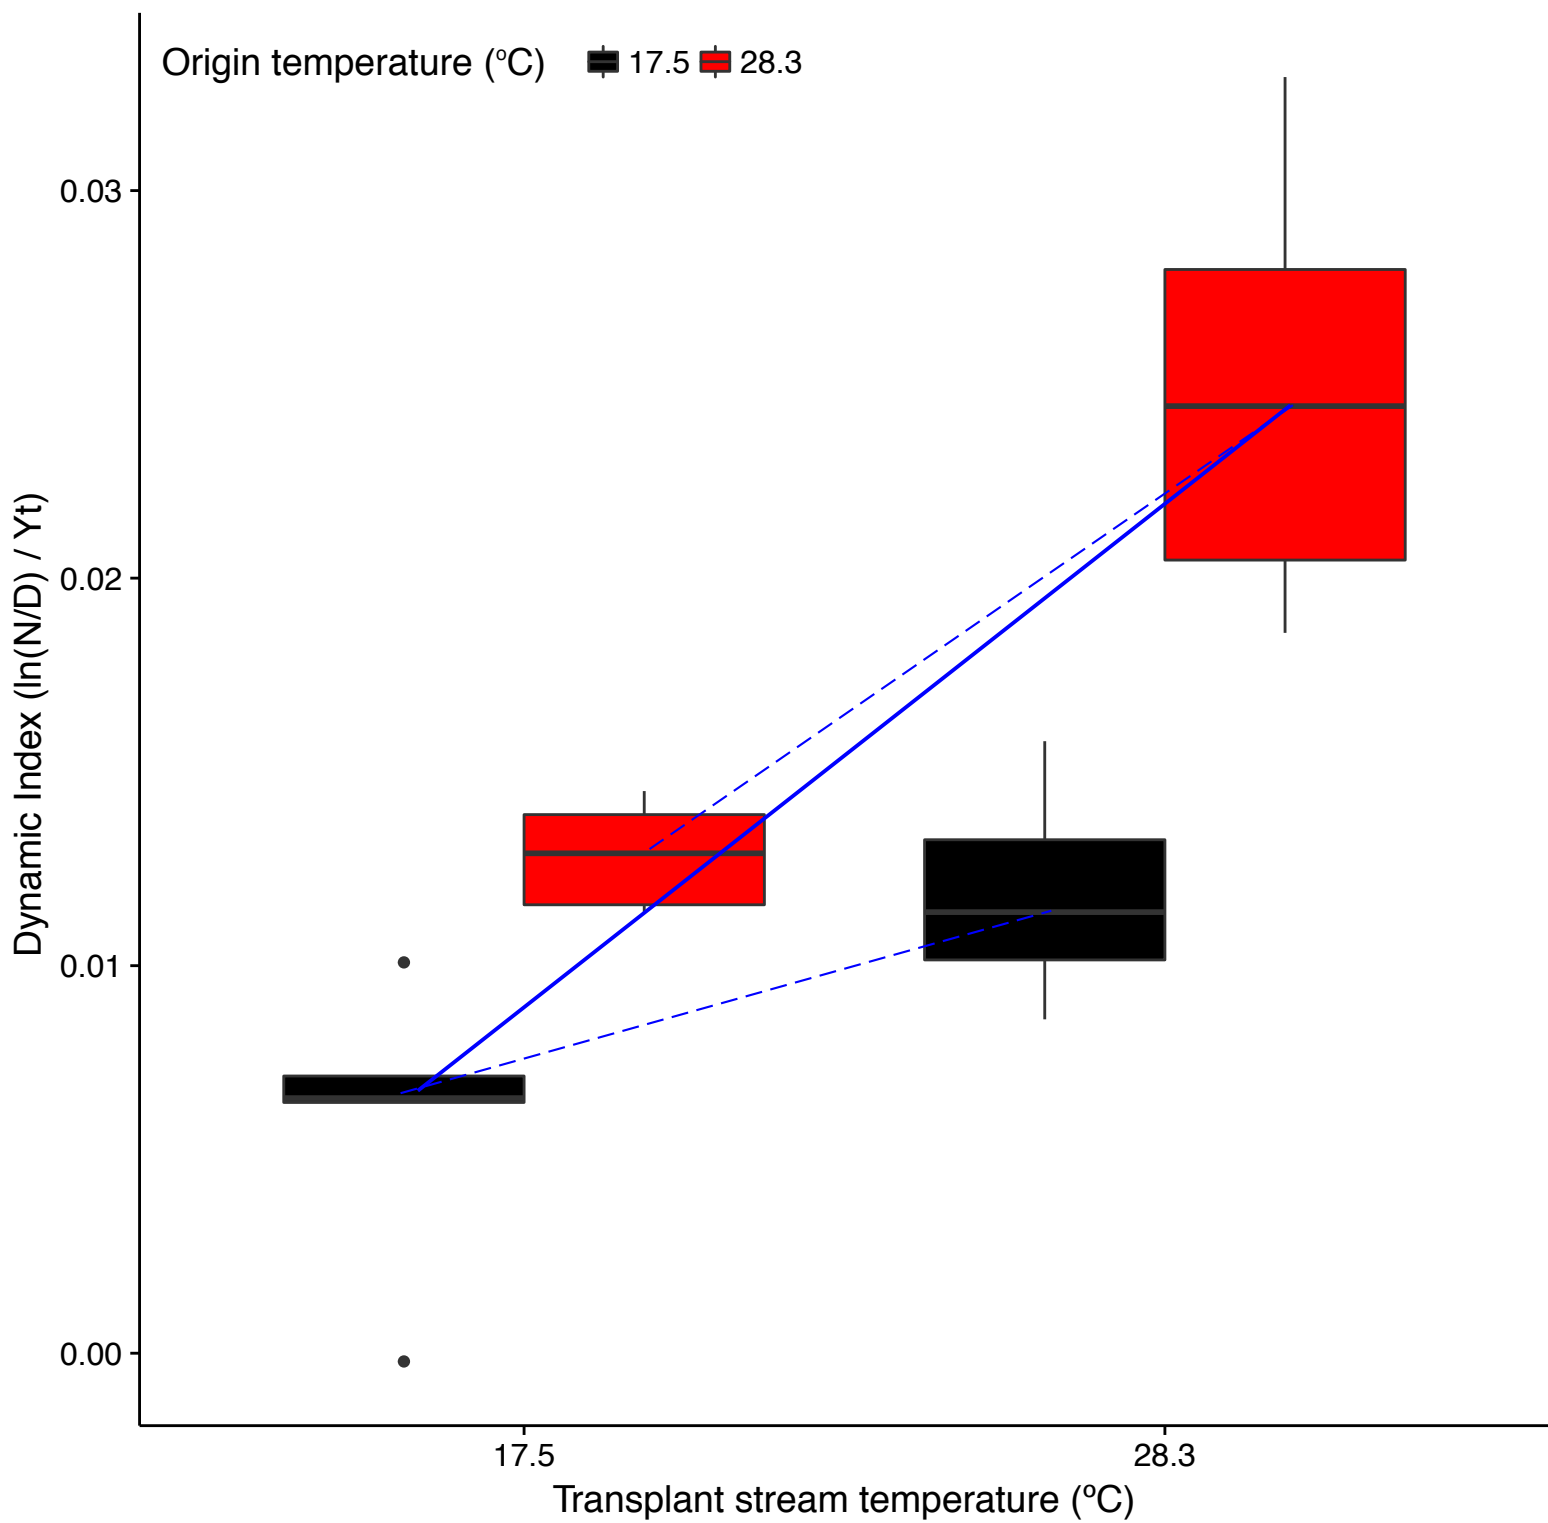

Source: https://www.biorxiv.org/content/10.1101/104513v1.full.pdf
